# Supplementary material
Source: Springer Nature journal article supplement (https://www.springermedizin.de/resource/supplementary/12936_2007_441_MOESM1_ESM.pdf/9547454)

## Parsimonious

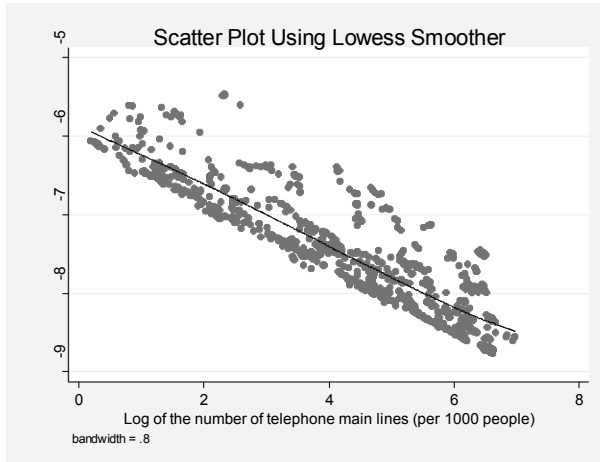

**A. Telephone**

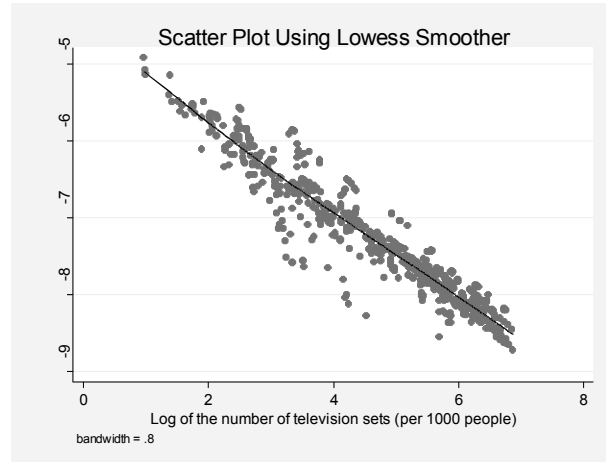

**B. TV**

## Extended

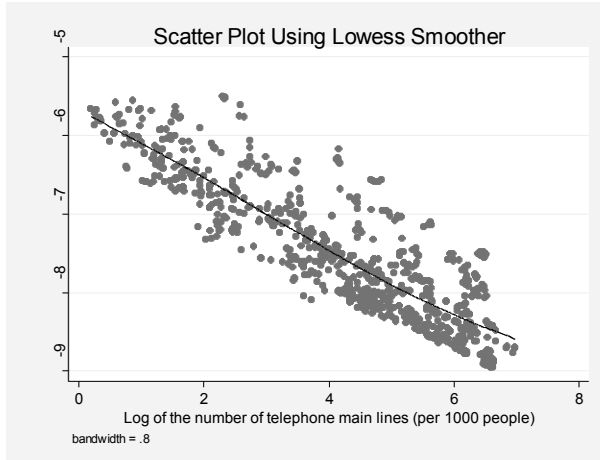

**C. Telephone**

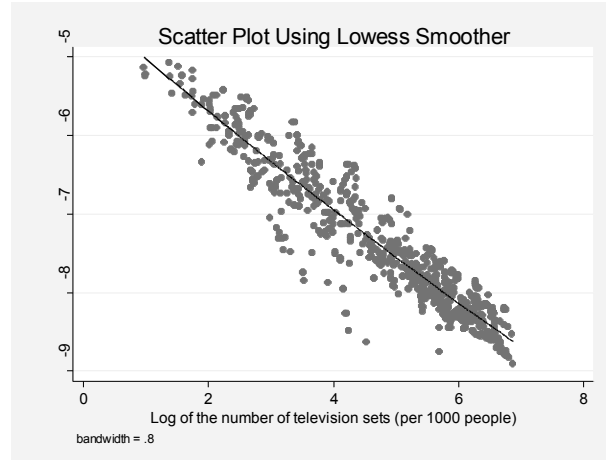

**D. TV**

Supplement: MOESM1 [file 9547454]
